# Supplementary material for: Transposable Elements versus the Fungal Genome: Impact on Whole-Genome Architecture and Transcriptional Profiles
Source: PLoS Genet. 2016 Jun 13;12(6):e1006108. doi: 10.1371/journal.pgen.1006108 (PMC4905642; doi:10.1371/journal.pgen.1006108)
Supplement: S1 Table — (XLSX) [file pgen.1006108.s001.xlsx]

## Sheet: Hoja1
		PC15			PC9
Family	Consensus length (kb)	Copies	Full length	kb	Copies	Full length	kb
Unknown_1	5.644	49	1	74.944	15	0	13.429
Unknown_2	9.617	6	4	48.225	2	0	3.132
Unknown_3	6.694	47	1	40.531	49	0	22.826
Unknown_4	7.763	28	0	37.914	42	1	51.558
Unknown_5	7.601	20	1	37.402	12	0	7.544
Unknown_6	3.067	28	7	35.828	20	0	9.849
Unknown_7	8.066	53	0	28.629	54	0	32.495
Unknown_8	4.198	13	4	28.12	8	2	15.591
Unknown_9	10.941	13	1	24.971	10	0	3.736
Unknown_10	6.306	18	0	24.818	17	0	4.996
Unknown_11	3.722	26	4	24.198	23	0	8.226
Unknown_12	3.254	17	0	24.171	6	0	2.37
Unknown_13	2.721	13	2	24.081	2	0	1.245
Unknown_14	6.487	65	1	23.904	71	0	16.97
Unknown_15	0.69	51	8	23.681	45	2	20.176
Unknown_16	1.322	32	5	22.297	30	6	22.632
Unknown_17	4.019	17	1	22.009	25	0	23.416
Unknown_18	2.061	31	1	21.176	24	0	9.735
Unknown_19	9.501	14	2	21.005	15	0	3.003
Unknown_20	0.548	91	15	20.652	77	5	15.273
Unknown_21	8.443	11	0	18.994	26	0	19.652
Unknown_22	4.404	6	4	18.53	4	0	1.362
Unknown_23	2.71	10	1	17.786	0	0	0
Unknown_24	0.42	50	29	17.003	53	25	16.479
Unknown_25	1.966	17	5	16.421	10	0	7.304
Unknown_26	1.383	18	9	16.26	22	8	18.189
Unknown_27	1.558	31	0	16.067	23	0	5.334
Unknown_28	2.964	14	0	15.717	8	0	7.377
Unknown_29	2.184	9	4	15.004	7	1	5.814
Unknown_30	1.487	12	8	14.841	13	5	11.354
Unknown_31	3.161	13	3	14.507	3	1	3.722
Unknown_32	1.067	19	10	14.242	21	10	14.72
Unknown_33	4.828	23	0	12.639	21	0	11.159
Unknown_34	0.64	53	0	12.255	53	0	10.012
Unknown_35	1.711	12	5	11.792	9	2	8.466
Unknown_36	1.672	13	5	11.629	10	0	3.744
Unknown_37	0.811	23	6	11.277	21	2	9.21
Unknown_38	1.092	10	10	10.895	6	1	2.798
Unknown_39	1.585	14	4	9.457	9	2	4.532
Unknown_40	0.464	23	12	8.478	21	13	8.093
Unknown_41	0.845	24	4	8.353	13	0	3.669
Unknown_42	0.64	14	12	8.232	18	4	7.149
Unknown_43	1.061	11	0	7.844	20	0	10.794
Unknown_44	3.442	15	0	7.567	5	0	1.395
Unknown_45	2.379	17	2	7.498	18	0	3.457
Unknown_46	1.012	9	6	7.477	6	0	2.635
Unknown_47	1.892	16	0	7.431	20	0	4.938
Unknown_48	0.855	15	1	7.223	21	0	7.595
Unknown_49	1.29	12	5	7.194	8	0	2.661
Unknown_50	5.969	4	0	7.098	9	0	10.503
Unknown_51	0.277	27	21	6.893	18	13	4.182
Unknown_52	0.406	18	17	6.841	17	15	6.343
Unknown_53	0.364	24	12	6.728	22	13	6.383
Unknown_54	0.661	21	4	6.643	19	5	6.403
Unknown_55	0.802	14	4	6.425	16	4	6.651
Unknown_56	1.404	8	4	6.422	9	0	3.278
Unknown_57	2.109	18	1	6.068	12	0	3.384
Unknown_58	0.755	11	6	5.841	11	3	4.366
Unknown_59	0.869	20	4	5.615	16	0	2.864
Unknown_60	0.59	15	7	5.598	6	3	3.108
Unknown_61	0.866	18	0	5.59	15	0	4.087
Unknown_62	1.825	12	0	5.375	9	0	4.778
Unknown_63	0.798	17	0	5.296	19	0	6.451
Unknown_64	0.289	20	18	5.257	8	4	1.594
Unknown_65	2.522	10	0	5.139	5	0	2.379
Unknown_66	0.323	16	15	4.984	16	16	5.093
Unknown_67	0.518	12	5	4.826	15	8	6.309
Unknown_68	0.921	6	5	4.804	7	4	4.15
Unknown_69	0.607	8	0	4.635	16	3	7.234
Unknown_70	1.352	8	0	4.348	2	0	0.597
Unknown_71	0.266	20	8	4.333	4	1	0.821
Unknown_72	0.914	7	3	4.234	7	0	2.318
Unknown_73	0.809	7	5	4.155	6	0	1.527
Unknown_74	0.596	19	3	4.152	32	11	10.145
Unknown_75	2.028	6	0	4.037	10	0	6.517
Unknown_76	0.973	4	4	3.892	4	4	3.892
Unknown_77	0.3	15	10	3.886	22	9	5.275
Unknown_78	0.866	17	0	3.674	16	0	4.042
Unknown_79	0.55	15	5	3.646	19	4	4.274
Unknown_80	0.372	11	8	3.435	17	8	4.658
Unknown_81	0.336	13	6	3.351	5	2	1.273
Unknown_82	0.699	5	4	3.259	3	2	1.404
Unknown_83	0.604	6	5	3.194	9	3	4.336
Unknown_84	2.326	14	0	3.146	19	1	11.714
Unknown_85	1.047	3	1	3.141	1	1	1.047
Unknown_86	0.888	5	3	3.128	2	1	1.12
Unknown_87	0.36	9	8	3.078	8	5	2.514
Unknown_88	0.434	10	5	3.064	9	2	2.033
Unknown_89	0.337	18	5	3.062	13	3	2.234
Unknown_90	0.613	8	3	2.914	11	5	4.594
Unknown_91	0.547	8	5	2.87	8	6	3.358
Unknown_92	0.294	12	8	2.796	17	8	3.743
Unknown_93	0.238	18	8	2.794	15	4	1.895
Unknown_94	0.269	10	9	2.567	5	5	1.338
Unknown_95	0.53	8	4	2.566	2	0	0.404
Unknown_96	0.256	22	3	2.518	28	1	2.899
Unknown_97	0.22	14	9	2.502	18	11	3.082
Unknown_98	0.378	8	3	2.307	11	4	3.099
Unknown_99	3.845	3	0	2.3	8	1	7.669
Unknown_100	0.904	4	0	2.203	10	0	3.044
Unknown_101	0.466	10	2	2.19	8	2	2.028
Unknown_102	0.388	9	0	2.145	7	2	1.787
Unknown_103	1.619	4	0	2.021	6	0	3.092
Unknown_104	0.35	6	5	1.976	7	5	2.205
Unknown_105	0.223	11	7	1.958	10	5	1.843
Unknown_106	9.829	4	0	1.907	7	0	12.768
Unknown_107	0.489	4	3	1.803	12	6	4.821
Unknown_108	0.565	4	3	1.78	4	3	1.78
Unknown_109	0.41	5	1	1.77	5	2	1.887
Unknown_110	0.243	11	5	1.766	8	3	1.241
Unknown_111	7.853	6	0	1.747	7	1	16.877
Unknown_112	0.502	6	1	1.712	10	1	3.127
Unknown_113	0.33	5	4	1.5	5	5	1.65
Unknown_114	0.277	4	2	1.433	5	3	3.142
Unknown_115	0.252	8	4	1.41	7	1	0.712
Unknown_116	2.255	5	0	1.404	11	0	5.211
Unknown_117	0.433	5	2	1.342	2	0	0.573
Unknown_118	0.658	2	2	1.316	8	4	3.81
Unknown_119	1.477	4	0	1.289	5	0	2.911
Unknown_120	0.416	5	1	1.14	10	4	2.676
Unknown_121	0.224	7	2	1.125	6	2	0.753
Unknown_122	0.321	6	0	1.085	6	1	1.236
Unknown_123	0.225	11	2	1.054	32	7	3.311
Unknown_124	0.642	6	0	0.893	11	0	1.768
Unknown_125	0.236	4	2	0.858	4	3	0.944
Unknown_126	0.825	2	0	0.839	5	0	2.068
Unknown_127	0.807	3	0	0.774	2	0	0.731
Unknown_128	0.364	3	0	0.672	7	4	2.142
Unknown_129	1.407	2	0	0.637	6	0	3.094
Unknown_130	0.464	1	1	0.464	5	4	2.021
Unknown_131	1.044	2	0	0.331	4	0	1.435
Unknown_132	0.234	2	0	0.327	0	0	0
Unknown_133	0.276	2	1	0.305	0	0	0
Unknown_134	1.082	2	0	0.243	3	0	1.454
Unknown_135	0.204	3	0	0.215	7	1	0.676
Unknown_136	0.589	1	0	0.18	3	0	0.606
Unknown_137	0.671	1	0	0.102	6	2	2.504
Unknown_138	0.824	1	0	0.062	0	0	0
Unknown_139	0.935	1	0	0.044	6	0	2.063
Unknown_140	0.382	0	0	0	7	4	1.797
Unknown_141	0.385	0	0	0	2	0	0.324
Unknown_142	1.982	0	0	0	1	0	0.252
Unknown_143	0.488	0	0	0	8	4	3.007
Unknown_144	0.228	0	0	0	1	0	0.176
