# Supplementary material for: Transposable Elements versus the Fungal Genome: Impact on Whole-Genome Architecture and Transcriptional Profiles
Source: PLoS Genet. 2016 Jun 13;12(6):e1006108. doi: 10.1371/journal.pgen.1006108 (PMC4905642; doi:10.1371/journal.pgen.1006108)
Supplement: S3 Dataset — (XLSX) [file pgen.1006108.s009.xlsx]

## Sheet: Table S2
	Percentage of masked sequence in PC9 libraries
TE family	Dataset 1 (1.58x)	Dataset 2 (1.76x)
Gypsy_2	0.55	0.47
Gypsy_3	0.41	0.39
Gypsy_1	0.39	0.33
Gypsy_6	0.20	0.22
Gypsy_9	0.17	0.19
Copia_4	0.17	0.14
Gypsy_7	0.17	0.15
Gypsy_41	0.15	0.13
Gypsy_25	0.15	0.17
Gypsy_10	0.13	0.11
Copia_1	0.12	0.11
LINE_1	0.12	0.12
Gypsy_4	0.11	0.11
Gypsy_15	0.10	0.11
Gypsy_30	0.10	0.09
Gypsy_11	0.09	0.07
HELPO1	0.09	0.06
Copia_3	0.09	0.09
Gypsy_18	0.09	0.08
Gypsy_19	0.08	0.09
Gypsy_35	0.08	0.08
DIRS_2	0.07	0.10
Gypsy_23	0.07	0.08
Gypsy_5	0.07	0.08
Gypsy_45	0.06	0.05
Gypsy_21	0.06	0.04
Gypsy_27	0.06	0.05
Gypsy_13	0.06	0.05
Gypsy_8	0.06	0.05
Gypsy_31	0.06	0.05
Gypsy_29	0.05	0.03
Gypsy_38	0.05	0.05
Gypsy_24	0.05	0.05
Tc1_mariner	0.05	0.04
Gypsy_26	0.04	0.04
Copia_5	0.04	0.04
Gypsy_17	0.04	0.06
Gypsy_40	0.04	0.03
Gypsy_22	0.04	0.04
Copia_16	0.04	0.02
LINE_3	0.03	0.04
Copia_10	0.03	0.03
Gypsy_43	0.03	0.03
Copia_11	0.03	0.02
Gypsy_16	0.03	0.03
DIRS_3	0.03	0.04
Gypsy_34	0.03	0.03
Gypsy_50	0.03	0.02
Copia_8	0.03	0.01
Gypsy_20	0.02	0.03
Gypsy_46	0.02	0.02
Gypsy_47	0.02	0.02
Gypsy_33	0.02	0.03
LINE_2	0.02	0.01
Gypsy_14	0.02	0.02
Gypsy_44	0.02	0.01
Gypsy_51	0.02	0.02
Copia_15	0.02	0.01
Gypsy_42	0.02	0.02
HELPO2	0.02	0.01
Gypsy_48	0.02	0.02
Gypsy_49	0.01	0.01
Copia_13	0.01	0.01
Copia_2	0.01	0.02
DIRS_1	0.01	0.02
Copia_14	0.01	0.02
Gypsy_52	0.01	0.02
Copia_12	0.01	0.01
Copia_6	0.01	0.01
Copia_17	0.01	0.00
Copia_9	0.00	0.00
Gypsy_53	0.00	0.00
DIRS_4	0.00	0.00
Copia_7	0.00	0.00
Gypsy_28	0.00	0.00
Gypsy_12	0.00	0.00
Gypsy_39	0.00	0.00
Gypsy_32	0.00	0.00
Gypsy_37	0.00	0.00
Gypsy_36	0.00	0.00
TOTAL	5.14	4.82
