# Supplementary material for: Transposable Elements versus the Fungal Genome: Impact on Whole-Genome Architecture and Transcriptional Profiles
Source: PLoS Genet. 2016 Jun 13;12(6):e1006108. doi: 10.1371/journal.pgen.1006108 (PMC4905642; doi:10.1371/journal.pgen.1006108)
Supplement: S3 Table — (XLSX) [file pgen.1006108.s003.xlsx]

## Sheet: Hoja2
	ASCOMYCETES				BASIDIOMYCETES
Classification	Botrytis cinerea		Fusarium		Cryptococcus neoformans		Panerochaete		Pleurotus ostreatus		Serpula lacrymans		Puccinia		Pseudozyma		Laccaria bicolor	Mixia osmundae
	B05.10	T4	oxysporum	graminearum	H99	JEC21	chrysosporium	carnosa	PC15	PC9	7.3	7.9	graminis	striiformis	antarctica T34	hubeiensis SY62
DNA transposons
Academ	0	0	0	0	0	0	0	0	0	0	0	0	0.16	0.12	0.00	0.00	0.03	0.01
EnSpm	0	0	0	0	0.26	0.35	0.00	0.06	0	0	0.34	0.50	0.24	0.08	0.00	0.00	0.28	0.00
Crypton	0	0	0	0	0.04	0.07	0	0	0	0	0	0	0		0	0	0	0
hAT	0	0	1.38	0.00	0	0	0.14	0.38	0	0	0.09	0.11	0.75	0.48	0.01	0.01	0.22	0.01
MuLE	0	0	0.83	0.01	0.02	0.18	0	0	0	0	0	0	2.21	0.46	0.00	0.00	0	0
PIF-Harbinger	0	0	0	0	0.02	0.11	0	0	0	0	0.41	0.49	1.31	0.48	0.00	0	0.33	0.00
PiggyBac	0	0	0.45	0.01	0	0	0	0	0	0	0	0	0	0	0	0	0	0
Tir1-Mariner	0.34	0.54	2.35	0.1	0.15	0.07	0.06	0.06	0.02	0.03	0.61	0.69	0.62	0.28	0	0	0.69	0
Helitron	0	0	0.26	0.00	0.05	0	0.05	0.08	0.26	0.08	0.23	0.26	0.80	0.32	0	0	0.75	0
Non-LTR retrotransposons
CR1	0	0	0	0	0	0	0	0	0.00	0	0	0	0.00	0	0	0	0	0
CRE	0	0	0.05	0	0.36	0.54	0	0	0	0	0	0	0	0	0	0	0	0
Jockey	0	0	0	0	0	0	0	0	0	0	0	0	0.00	0.00	0	0	0	0
L1	0	0	0	0	0	0	0.00	0.09	0	0	0	0	0	0	0	0	0	0
Penelope	0	0	0	0	0	0	0.12	0.04	0	0	0.07	0.07	0	0	0	0	0	0
Tad1	0	0	1.57	0.46	0	0	0.15	0.15	0.14	0.15	0.07	0.09	0.78	0.16	0	0	1.01	0.00
LTR-retrotransposons
Copia	0.27	0.33	1.87	0.03	0.34	0.37	1.29	1.82	0.68	0.24	8.38	9.29	8.51	4.40	0.00	0.00	2.32	0.01
Gypsy	0.53	0.76	0.65	0.03	2.73	3.57	4.86	4.22	4.95	1.89	15.56	18.07	9.74	3.62	0.00	0.00	4.15	0.00
DIRS	0	0	0	0	0	0	0.08	0.04	0.11	0.11	0.25	0.26	0.84	0.34	0	0	0.90	0
BEL	0	0	0	0	0	0	0.01	0.04	0	0	0	0	0.04	0.00	0	0	0.04	0
Endogenous Retrovirus	0	0	0	0	0	0	0.04	0.01	0	0	0	0	0	0	0	0	0	0
Unclassified	1.01	1.06	6.35	0.76	1.94	1.38	3.38	11.42	3.79	2.41	7.04	8.29	17.29	10.84	0.09	0.11	27.21	1.43
Low_complexity	0.63	0.98	0.16	0.15	0.37	0.37	0.16	0.07	0.15	0.13	0.12	0.11	0.24	0.27	0	0.18	0.17	0.02
Satellite	0.00	0.00	0.00	0	0	0	0.00	0.00	0	0	0	0	0.00	0	0	0	0.00	0
Simple_repeat	0.92	0.95	0.17	0.22	0.22	0.17	0.20	0.11	0.17	0.13	0.07	0.08	0.29	0.17	0.66	0.34	0.14	0.11
Genome size (Mb)	42.66	41.61	61.36	36.45	18.87	19.05	35.15	46.29	34.34	35.63	47.04	42.73	88.64	64.78	18.07	18.44	60.71	13.63
Percentage of Genome size (known TE families)	1.15	1.63	9.42	0.64	3.97	5.25	6.80	6.98	6.14	2.50	26.01	29.82	26.01	10.74	0.02	0.02	10.73	0.03
Percentage of Genome size (all TE families)	2.2	2.7	15.8	1.4	5.9	6.6	10.2	18.4	9.9	4.9	33.0	38.1	43.3	21.6	0.1	0.1	37.9	1.5
